# Supplementary material for: Chronic DNA Replication Stress Reduces Replicative Lifespan of Cells by TRP53-Dependent, microRNA-Assisted MCM2-7 Downregulation
Source: PubMed Central journal article supplement (PMC4713100; doi:10.1371/journal.pgen.1005787), 2016-01-14
Supplement: pgen.1005787.s007.pdf [file pgen.1005787.s007.pdf]

## Supplementary Tabel

| Name         | Sequence (5' to 3')        | Purpose                   |
|--------------|----------------------------|---------------------------|
| Chaos3typeL  | CATTGATCAGCTCATCACCA       | Chaos3 mutant genotyping  |
| Chaos3typeR  | CACATACCATTTGCTTGTCAG      |                           |
| Mcm2-GT-F    | CCCTCCTCCTGCAGGTGGAAAGCAC  | Mcm2 gene-trap genotyping |
| Mcm2-GT-R1   | GCAGTAGAGTTCCAGGAGGAGCC    |                           |
| Mcm2-GT-R2   | GGTGGTGTAAGGAACAGATGGAC    |                           |
| Mcm2 mRNA-F  | TTCCCGCTTTGATGTCCTG        | Mcm2 qRT-PCR              |
| Mcm2 mRNA-R  | ACCATTAGTCAACCCTTCATCC     |                           |
| Mcm3 mRNA-F  | AGGAAGACTCATGCCAAGGATGGA   | Mcm3 qRT-PCR              |
| Mcm3 mRNA-R  | TGGGCTCACTGAGTTCCACTTTCT   |                           |
| Mcm4 mRNA-F  | ACAGGAATGAGTGCCACTTCTCGT   | Mcm4 qRT-PCR              |
| Mcm4 mRNA-R  | AAAGCTCGCAGGGCTTCTTCAAAC   |                           |
| Mcm5 mRNA-F  | CTGGATGCTGCTTTGTCTGGCAAT   | Mcm5 qRT-PCR              |
| Mcm5 mRNA-R  | TGTGTTCAGACACCTGAGAGCCAA   |                           |
| Mcm6 mRNA-F  | TCACCAAGTCTCGTGGAGAATCA    | Mcm6 qRT-PCR              |
| Mcm6 mRNA-R  | TTTAGGCTGAACCTCGTCACAGCA   |                           |
| Mcm7 mRNA-F  | CCCTGCCCAATTTGAACCTTTGGA   | Mcm7 qRT-PCR              |
| Mcm7 mRNA-R  | TCTCCACATATGCTGCGGTGATGT   |                           |
| Pcna mRNA-F  | GGGTTGGTAGTTGTGCTGT        | Pcna qRT-PCR              |
| Pcna mRNA-R  | TCCAGCACCTTCTTCAGGAT       |                           |
| Cdc6 mRNA-F  | GCTGCCCTGGACTTTTTAAG       | Cdc6 qRT-PCR              |
| Cdc6 mRNA-R  | GCTGCTTGACTCGGATATGA       |                           |
| Cdkn2a-qF    | ACATCAAGACATCGTGCGATATT    | Cdkn2a qRT-PCR            |
| Cdkn2a-qR    | CGGTACACAAAGACCACCC        |                           |
| mp16INK4a-qF | AATCTCCGCGAGGAAAGCGAACT    | p16-Ink4a qRT-PCR         |
| mp16INK4a-qR | GTGAACGTTGCCATCATCATCACC   |                           |
| mp19ARF-qF   | CGTGAACATGTTGTTGAGGCTAGAGA | p19-ARF qRT-PCR           |
| mp19ARF-qR   | TCTGCACCGTAGTTGAGCAGAAGAG  |                           |
| ActB mRNA-F  | ACCTTCTACAATGAGCTGCG       | beta-Actin qRT-PCR        |
| ActB mRNA-R  | CTGGATGGCTACGTACATGG       |                           |
| Cdk2 mRNA-F  | ATGAGGTGGTTTGGCCAGGAGTTA   | Cdk2 qRT-PCR              |
| Cdk2 mRNA-R  | CTGCTTTGGCTGAAATCCGCTTGT   |                           |
| Ccne1 mRNA-F | CCTCCAAAGTTGCACCAGTTTGCT   | Cyclin E1 qRT-PCR         |
| Ccne1 mRNA-R | TCGTTGACATAGGCCACTTGACACA  |                           |
| Ccne2 mRNA-F | GACGCAGTAGCCGTTTACAA       | Cyclin E2 qRT-PCR         |
| Ccne2 mRNA-R | ATAATGCAAGGGCTGATTCC       |                           |
| Ccna2 mRNA-F | CTTGGCTGCACCAACAGTAA       | Cyclin A2 qRT-PCR         |
| Ccna2 mRNA-R | ATGACTCAGGCCAGCTCTGT       |                           |

| Name          | Sequence (5' to 3')                        | Purpose                                                 |
|---------------|--------------------------------------------|---------------------------------------------------------|
| miR-34a_A     | GAATGTGTATACGTGTTTTGCCTGA                  | miR-34a genotyping                                      |
| miR-34a_F     | TGGCCCCTTTAATTTACAAGCCCA                   |                                                         |
| miR-34a_D     | AGCTGACATGCCAGGAATGCTGA                    |                                                         |
| miR-34bc_A    | CTGCGCTTCTTTCTTCGATGTAGC                   | miR-34bc genotyping                                     |
| miR-34bc_B    | TGGCTTTAGGATCTCCATTTTCAGC                  |                                                         |
| miR-34bc_D    | ACCTGGTTAAGTGGGCTGAGTTCC                   |                                                         |
| pmirGLO.Seq_F | GACGAGGTGCCTAAAGGAC                        | Sequencing primers for pmirGLO                          |
| pmirGLO.Seq_R | CCAACTCAGCTTCCTTTCCG                       |                                                         |
| Mcm2 3'UTR F  | AAATTTGCTAGCGACCAGCACAGGGGCCTC             | Primers for cloning full-length Mcm2 3'UTR into pmirGLO |
| Mcm2 3'UTR R  | AAATTTCTGCAGGTAGCGCTATTTAGGTTT TATTC       |                                                         |
| Mcm3 3'UTR F  | AAATTTGCTAGCAGTTGTTGCTACCAAGTAC            | Primers for cloning full-length Mcm3 3'UTR into pmirGLO |
| Mcm3 3'UTR R  | AAATTTCTGCAGGTACAAAATAGTTATATT TACTCAGTATG |                                                         |
| Mcm4 3'UTR F  | AAATTTGCTAGCGCTGCATGGCCCTCGGAC             | Primers for cloning full-length Mcm4 3'UTR into pmirGLO |
| Mcm4 3'UTR R  | AAATTTCTGCAGGAATTCAAATGGTTTAGA GATTTATTG   |                                                         |
| Mcm5 3'UTR F  | AAATTTGCTAGCGCCATTGCCATCAACC               | Primers for cloning full-length Mcm5 3'UTR into pmirGLO |
| Mcm5 3'UTR R  | AAATTTCTGCAGGGGTGGCCACACTTTTA ATCC         |                                                         |
| Mcm6 3'UTR F  | AAATTTGCTAGCGGTATTGAAGGTA ACTTGA TGG       | Primers for cloning full-length Mcm6 3'UTR into pmirGLO |
| Mcm6 3'UTR R  | AAATTTCTGCAGGCACAGAACAAGTTGTTT TATTTTCATG  |                                                         |
| Mcm7 3'UTR F  | AAATTTGCTAGCTAGCCAGTTTTTACACCCTC C         | Primers for cloning full-length Mcm7 3'UTR into pmirGLO |
| Mcm7 3'UTR R  | AAATTTCTGCAGGAACAAGCAAGAGGCAA TCAAAAC      |                                                         |
